# Supplementary material for: Arabidopsis thaliana nucleosidase mutants provide new insights into nucleoside degradation
Source: PubMed Central journal article supplement (PMC3147060; doi:10.1111/j.1469-8137.2011.03711.x), 2011-07
Supplement: nph0191-0349-SD1.pdf [file nph0191-0349-SD1.pdf]

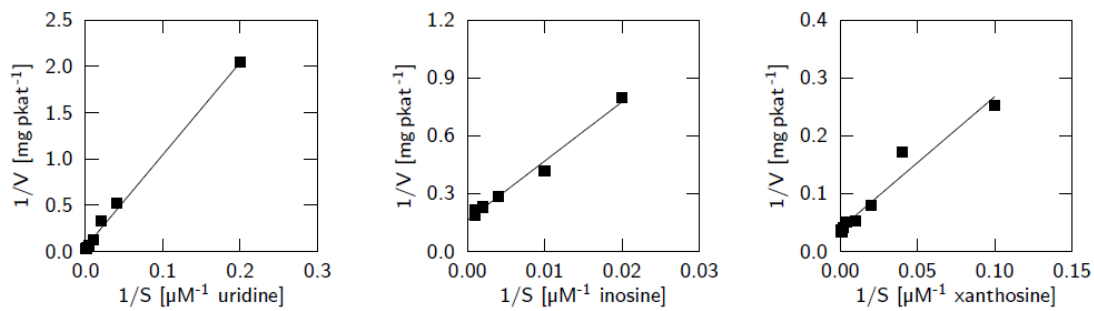

**Figure S1.** In vivo kinetic properties of nucleoside hydrolase activity in Arabidopsis leaf material. Data represent means of two biological replicates. Kinetic constants were determined from Lineweaver-Burk plots as follows: uridine ribohydrolase  $K_M = 202,5 \mu\text{M}$ , inosine ribohydrolase  $K_M = 206,8 \mu\text{M}$ , xanthosine ribohydrolase  $K_M = 57,9 \mu\text{M}$ .

```

# -# -
RihA -----MALP-ILLDCDPGHDDAIAIVLALASPELDVKAITSSAGNQ 40
RihB -----MEKRKIIIDCDPGHDDAIAIMMAAKHPAIDLLGITIVAGNQ 41
RihC -----MRLP-IFLDTPGIDDAVAIAAAAFAPPELDLQMLTTVAGNV 40
URH1 MDCGMENCGGISNGDVLGKHEKLIIDTDPGIDDSMAILMAFQTPELEILGLTTVFGNV 59
URH2 -----MAIGDRKKIIDTDPGIDDAMAI FVALNSPEVDVIGLTTIFGNV 44
      : : * * * * * : * * * : : * * *

++
RihA TPEKTLRNVLRMLTLLNRTDIPVAGGAVKP--LMRELIADNVHGESGLDGPALPEPTF 97
RihB TLDKTLINGLNVQKLEINVPVYAGMPQP--IMRQQIVADNIHGETGLDGPVFEPLTR 97
RihC SVEKTRRNALQLLHFW-NAEIPLAQGAAVP--LVRAPRDAASVHGESGMAGYDFVEHNR 96
URH1 STQDATRNALLLCEIAGFPDVPVAEGSSEP-LKGGIPRVADFVHGKNGLDVSLPPPSR 117
URH2 YTTLATRNALHLLLEVAGRTDIPVAEGTHKTFLNNTKLRADFVHGKDGGLGNQNFPPPK 103
      : * * : : * : * * * * * : * * * * * : : :

#
RihA APQNCTAVELMAKTLRESAEPVTIVSTGPQTNVALLLNHPHLSKRIARIVIMGGAMGL 155
RihB QAESTHAVKYIIDTLMASDGDITLVPVGPLSNIAVAMRMQPAILPKIREIVLMGGAYGT 155
RihC KPLGIAPFLAIRDALMRAPEPVTLVAIGPLTNIALLSQCPECKPYIRRLVIMGGSAGR 154
URH1 KKSEKSAAEFLDEKVEEYYPGEVITLALGPLTNLALAIKRDSSFASKVKKIVILGGAFFS 176
URH2 KPIEKSGPEFLVEQAKLCPGEITVVALGPLTNLALAVQLDPEFSKNVQIIVLGGFAV 162
      : : : * * * * * : * * * * * : : * * * * *

- -+
RihA -GNWTPAAEFNIYVDPEAAEIVFQSGIPVVMAGLDVTHKAQIHVEDTERFRAIGNPVST 214
RihB -GNFTPSAEFNIFADPEAARVFTSGVPLVMMGLDLTNQTVCTPDVIARMERAGGPAGE 214
RihC -GNCTPNAEFNIAADPEAAACVFRSGIEIVMCGLDVTNQAILTDPYLSLTPQLN-RTGK 212
URH1 LGNVNPAAEANIYGDPEAADVFTSGADITVVGINITTTQLKLSDDDLLELGNCKGKHSK 235
URH2 NGNVNPAEANIIFGDPEAADIVFTCGADI IAVGINVTHQVIMTADDKDLASSKGKLAQ 221
      * * * * * * * * * * * * * * * * * * * * * * * * * * * *

+ + +#
RihA IVAELLDFFLEYHKDEKWFVGGAPLHDPCTIAWLLKPELFTSVERWVG VETQKGYTQGM 273
RihB LFSDIMNFTLKTQFENY-GLAGGPVHDATCIGYLINPDGIKTQEMYVEVDVNSGPCYGR 272
RihC MLHALFSHYRSGSMQS----GLRMHDLCAIAWLVRPDLFTLKPCFVAVETQGEFTSGT 266
URH1 LISDMCKFYRDWHVKS-DGVYGVYLHDPVSVFVAVRVDLFTYKKGVVRVETQG-ICVGH 292
URH2 YLCKILDVYYDYHLTAY-EIKGVYLHDPATILAAFLPSLFTYTEGVARVQTSG-ITRGL 278
      . : . . * * * * * : * * * : . * * : . * * * * * *

RihA TVVDYYLGTGNKPN-----ATVMVDVDRQGFVDLLADRLKFYA--- 311
RihB TVCDELGVLGKPN-----TKVGITIDTDWFWGLVEECVRGYIKTH 313
RihC TVVDIDGCLGKPN-----VQVALDLVKGQFQWVAEVLALAS--- 304
URH1 TLMDQGLKRWNGSNPWGYSPTISVAWTVDVEGVLEYVKAKLMKP---- 336
URH2 TLLYNNLKRFEANEWSDKPTVKVAVTVDAPAVVKLIMDRLMES---- 322
      * : : * * * * * * * * * * * * * * *

```

**Figure S2.** Multiple sequence alignment of three ribonucleoside hydrolases RihA, RihB, and RihC of *Escherichia coli* and the two URH isoforms of the nonredundant proteome of *Arabidopsis* using Clustal 2.0.12. Symbols below the alignment are as follows: \*, identical residue; :, conserved substitution; ., semiconserved substitution. Symbols above the alignment indicate conserved residues involved in binding: #, Ca<sup>2+</sup> binding; -, ribose binding; +, base binding.

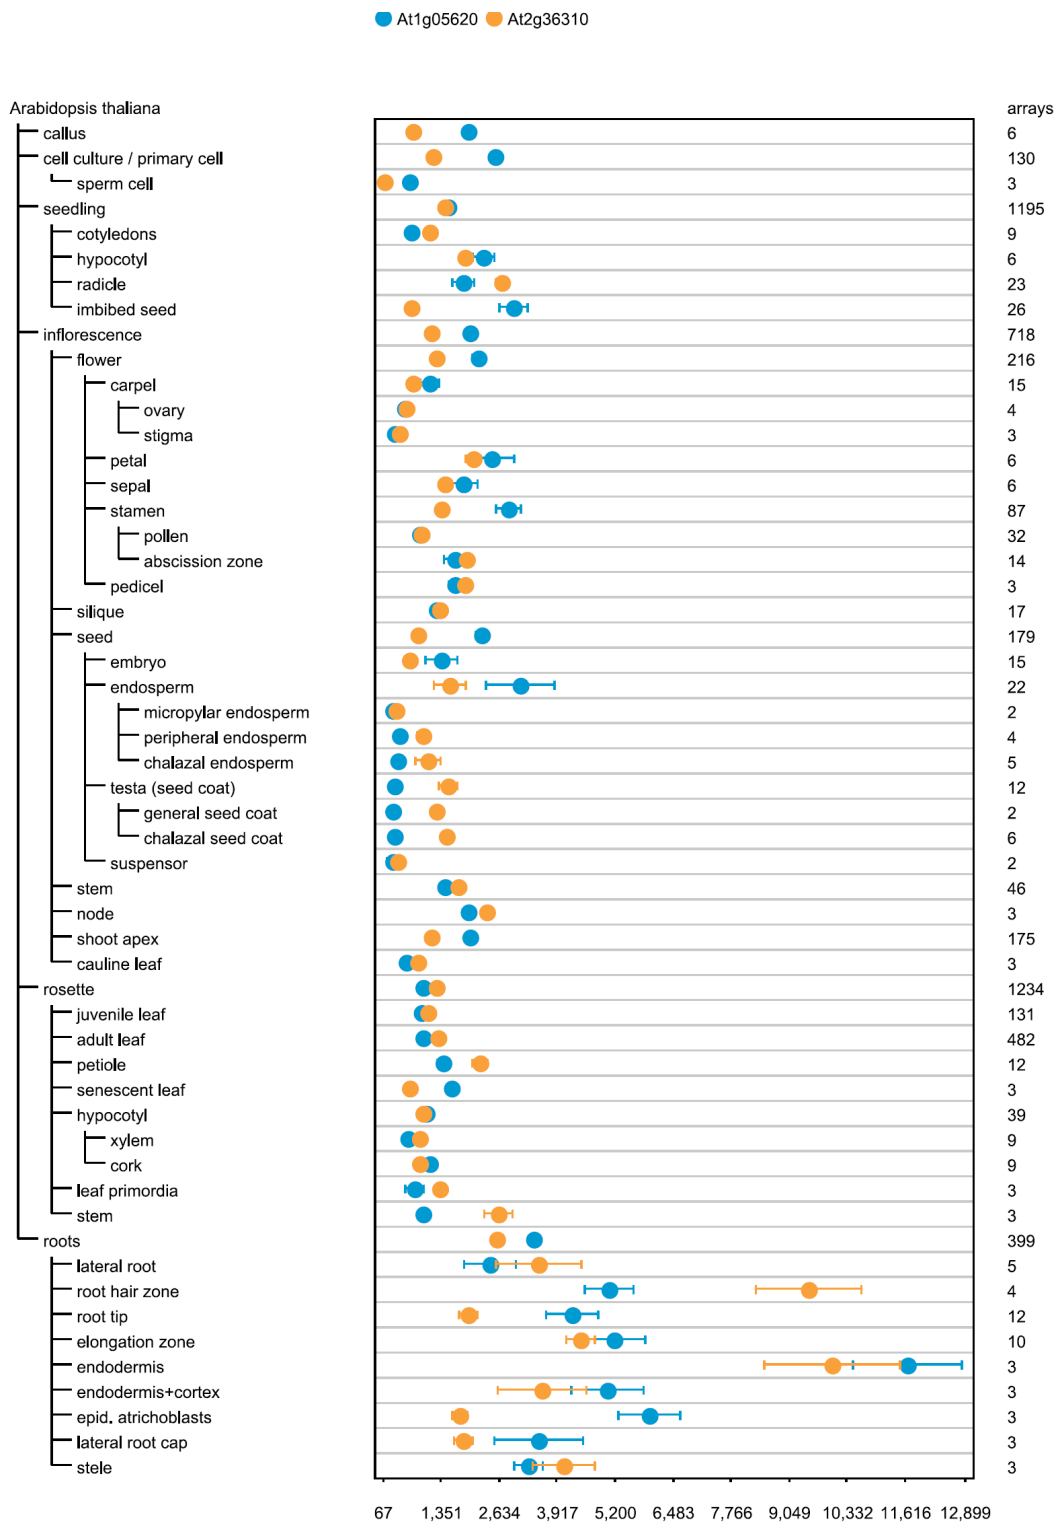

**Figure S3.** RNA expression of *URH1* (At2g36310) and *URH2* (At1g5620) according to Genevestigator (Zimmermann P, Hirsch-Hoffmann M, Hennig L, Gruissem W. (2004) GENVESTIGATOR: Arabidopsis microarray database and analysis toolbox. Plant Physiol 136: 2621-2632).

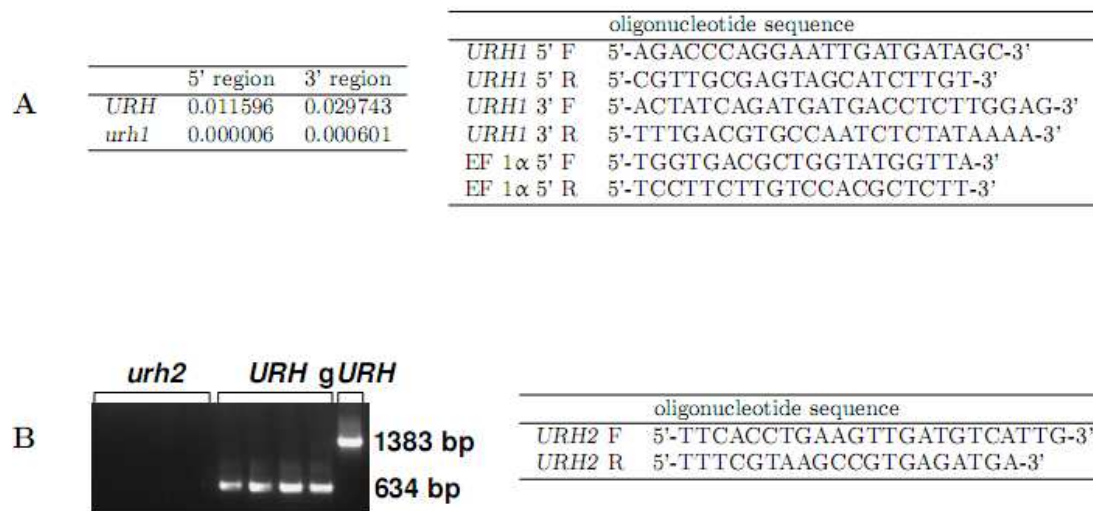

**Figure S4.** Expression of *URH* genes in *urh* mutants. A, Relative Expression of *URH1* in *urh1* mutant and wildtype Arabidopsis. The transcript levels were determined by quantitative realtime RT-PCR using two gene specific primer pairs in the 3' or 5' part of the transcript. The transcript levels were calculated relative to elongation factor 1 $\alpha$ . Data show means of four biological replicates. B, RT-PCR expression analysis of *URH2* transcript (634bp fragment) in *urh2* mutant and wildtype Arabidopsis (*URH*). RNA was extracted from 4 biological replicates of *urh2* mutant and wildtype Arabidopsis and processed as described in the Methods section. Genomic DNA of wildtype Arabidopsis (*gURH*) was used as control. All plants used in this analysis were six weeks old.

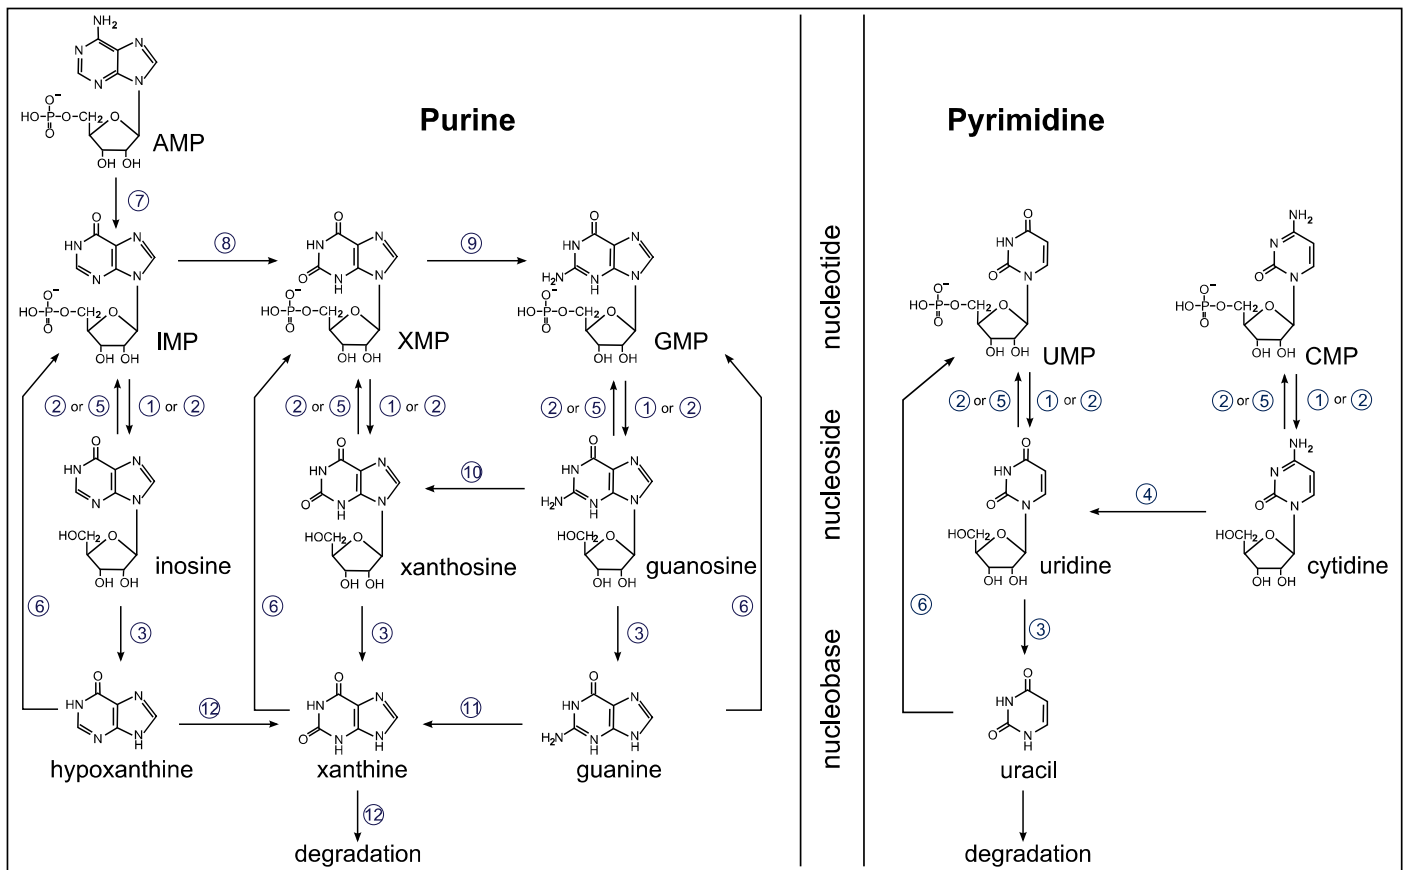

**Figure S5.** Nucleoside and nucleobase salvage pathways for purines and pyrimidines. Enzymes are numbered and general enzyme nomenclature is as follows: 1) NMP specific 5' nucleotidase; 2) nucleoside phosphotransferase; 3) **nucleoside hydrolase**; 4) cytidine deaminase; 5) nucleoside kinase; 6) nucleobase phosphoribosyl transferase; 7) AMP deaminase; 8) IMP dehydrogenase; 9) GMP synthase; 10) guanosine deaminase; 11) guanine deaminase; 12) xanthine dehydrogenase

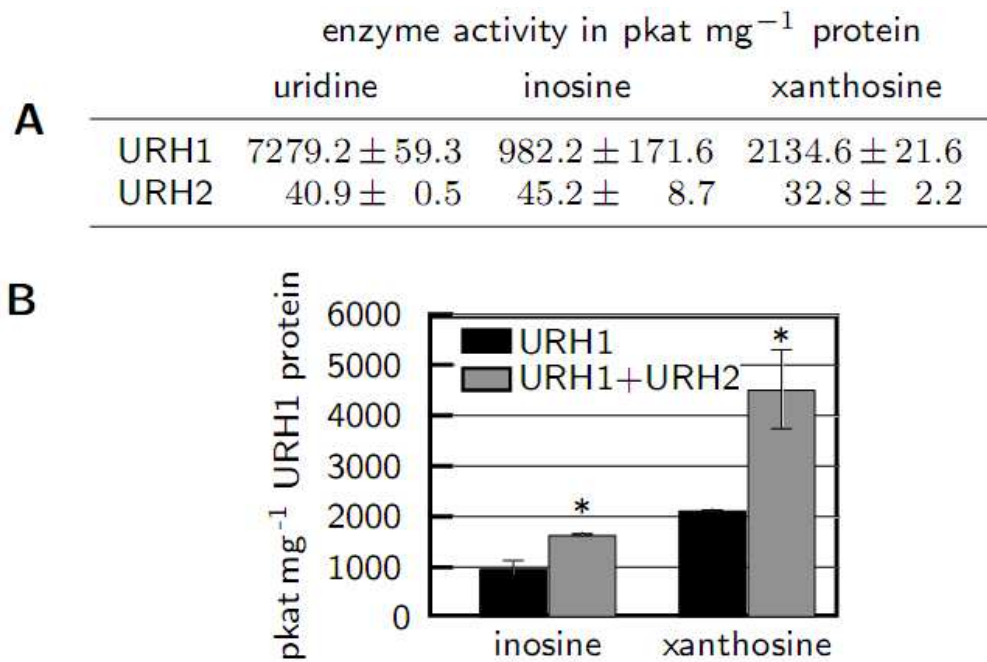

**Figure S6.** Nucleoside hydrolase activity of recombinant URH proteins. A, Total activity of nucleoside to nucleobase conversion after over-expression in *E. coli* and non-denaturing purification of recombinant URH1 and URH2 proteins from the soluble extracts. Activity measurements were performed from desalted eluate fractions with the respective nucleoside at 200  $\mu$ M. Data are expressed in pkat per mg protein after Ni-NTA agarose purification and show means  $\pm$  SD ( $n = 3$ ). B, Total activity of purified recombinant URH1 and a mixture of equal amounts of recombinant URH1 and URH2 from desalted eluate fractions. Data show means  $\pm$  SD ( $n = 3$ ). Significant differences ( $P < 0.05$ ) between URH1 and URH1 + URH2 using unpaired two-tailed  $t$ -tests are marked with \*.
